# Supplementary material for: Microbial Diversity in Subarctic Biocrusts from West Iceland following an Elevation Gradient
Source: MDPI journal article supplement (doi:10.3390/microorganisms9112195), 2021-10-21
Supplement: s1 [file s1]

**Supplementary Table S1.** List of primers used for the (a) amplicon and (b) sanger sequencing.

**a.**

| Gene | Organism      | Primers  | Sequence                 | Primer reference   |
|------|---------------|----------|--------------------------|--------------------|
| 16S  | Bacteria      | 341F     | CCTACGGGRSGCAGCAG        |                    |
|      |               | 802R     | TACNVGGGTATCTAATCC       |                    |
|      | Cyanobacteria | CYA_F    | GGGGAATYTTCCGCAATGGG     | Nübel et al. 1997  |
|      |               | CYA_R    | GACTACWGGGTATCTAATCCCWTT |                    |
| ITS  | Fungi         | Fungi_F  | CAHCGATGAAGAACGYRG       | Frey et al. 2016   |
|      |               | Fungi_R  | TCCTSCGCTTATTGATATGC     |                    |
| 18S  | Eukaryotes    | tarEuk_F | CCAGCASCYGC GGTAATTCC    | Stoeck et al. 2010 |
|      |               | tarEUK_R | ACTTTCGTTCTTGATYRA       |                    |

**b.**

| Organisms     | Molecular analysis | Primers | Sequence                      | Primer reference     |
|---------------|--------------------|---------|-------------------------------|----------------------|
| Cyanobacteria | PCR, sequencing    | BS-1F   | GATCCTKGCTCAGGATKAACGCTGGC    | Marin et al. 2002    |
|               | sequencing         | BS3F    | GCCAGCAGCCGCGGTAA             | Wilmotte et al. 1993 |
|               | sequencing         | BS4F    | GYAACGAGCGCAACCC              | Wilmotte et al. 1993 |
|               | sequencing         | BS8R    | AAGGAGGTGATCCAGCCGCA          | Wilmotte et al. 1993 |
|               | sequencing         | BL9R    | TTTGCGCCGCTCTGTGTGCCTAGGTATCC | Marin et al. 2002    |
|               | PCR                | CPL-10R | GCCGGCTCATTCTTCAAC            |                      |

|                       |                 |         |                            |            |
|-----------------------|-----------------|---------|----------------------------|------------|
| Eukaryotic microalgae | PCR, sequencing | EAF3    | TCGACAATCTGGTTGATCCTGCCAG  | Marin 2003 |
|                       | sequencing      | E528    | TGCCAGCAGCYGCGGTAATTCCAGC  | Marin 1998 |
|                       | sequencing      | 536R    | GWATTACCGCGGCKGCTG         | Marin 1998 |
|                       | sequencing      | BR      | TTGATCCTTCTGCAGGTTACCTAC   | Marin 1998 |
|                       | PCR             | ITS055R | CTCCTTGGTCCGTGTTTCAAGACGGG | Marin 1998 |

**Supplementary Table S2.** Differences of microbial community composition between the five studied sites based on pairwise PERMANOVA (9999 permutations). Asterisks corresponds to the level of significance (\*p<0.05, \*\*p<0.01, \*\*\*p<0.001).

| Pairs       | Bacteria       |                    | Cyanobacteria  |                     | Fungi          |                    | Eukaryotes     |                    |
|-------------|----------------|--------------------|----------------|---------------------|----------------|--------------------|----------------|--------------------|
|             | r <sup>2</sup> | F                  | r <sup>2</sup> | F                   | r <sup>2</sup> | F                  | r <sup>2</sup> | F                  |
| KRA vs. BOR | 0.34           | 3.04*              | 0.51           | 5.24*               | 0.27           | 2.27*              | 0.50           | 5.02*              |
| KRA vs. FIF | 0.21           | 1.55 <sup>ns</sup> | 0.24           | 1.55 <sup>ns</sup>  | 0.18           | 1.36 <sup>ns</sup> | 0.29           | 2.06*              |
| KRA vs. LSK | 0.27           | 2.18*              | 0.28           | 1.92*               | 0.26           | 2.07*              | 0.41           | 2.73 <sup>ns</sup> |
| KRA vs. GIL | 0.29           | 2.43*              | 0.30           | 2.09 <sup>ns</sup>  | 0.30           | 2.61*              | 0.32           | 1.91 <sup>ns</sup> |
| BOR vs. FIF | 0.39           | 3.80*              | 0.55           | 7.33*               | 0.32           | 2.89*              | 0.44           | 4.62*              |
| BOR vs. LSK | 0.53           | 6.89*              | 0.71           | 14.78 <sup>ns</sup> | 0.37           | 3.49*              | 0.65           | 9.34*              |
| BOR vs. GIL | 0.53           | 6.85*              | 0.86           | 36.42*              | 0.43           | 4.52*              | 0.59           | 7.07*              |
| FIF vs. LSK | 0.21           | 1.59 <sup>ns</sup> | 0.27           | 2.25*               | 0.27           | 2.23*              | 0.34           | 2.53*              |
| FIF vs. GIL | 0.35           | 3.24*              | 0.42           | 4.35*               | 0.28           | 2.32*              | 0.30           | 2.17*              |
| LSK vs. GIL | 0.41           | 4.11*              | 0.40           | 4.02*               | 0.37           | 3.58*              | 0.37           | 2.37 <sup>ns</sup> |

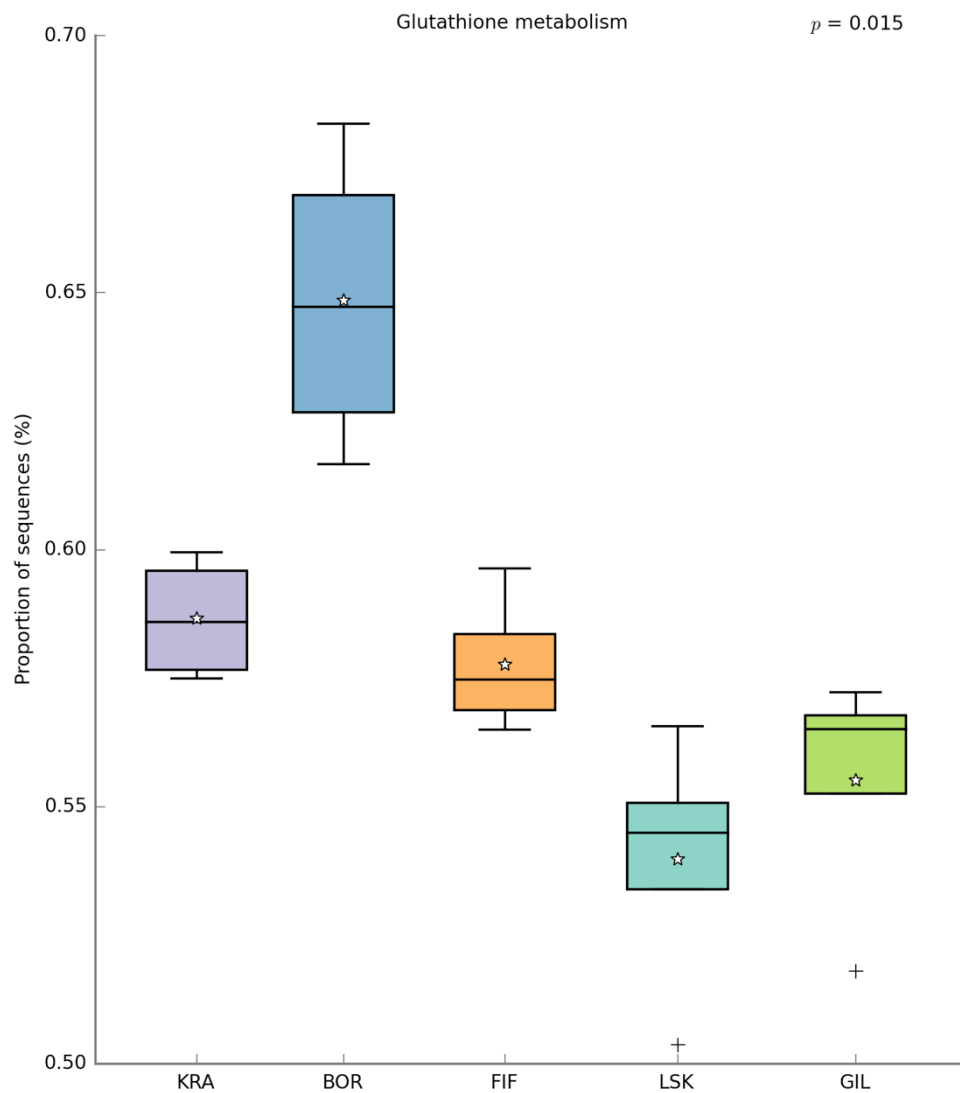

**Supplementary Figure S1** – Proportion of bacterial sequences potentially involved in glutathione metabolism estimated by matching of 16S rRNA gene amplicons with genomes from reference database (KEGG). The sites are listed in order of altitudinal gradient (10-157 m a.s.l.): KRA – Krákunes, BOR – Borgarfjarðarbraut, FIF – Fíflholt, LSK – Litla Skard, GIL – Giljar.

a.

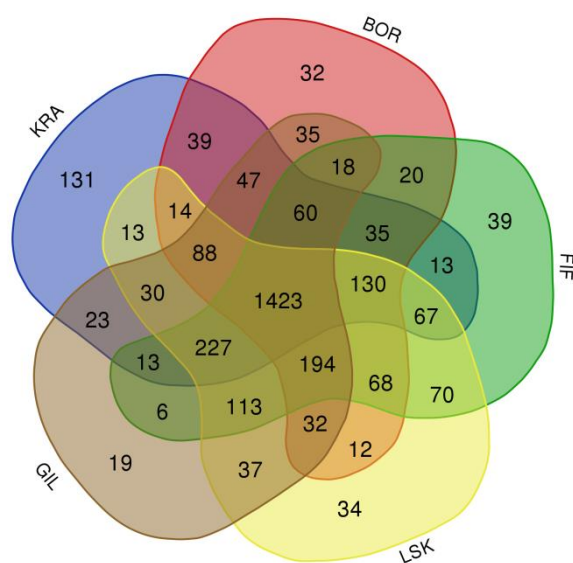

b.

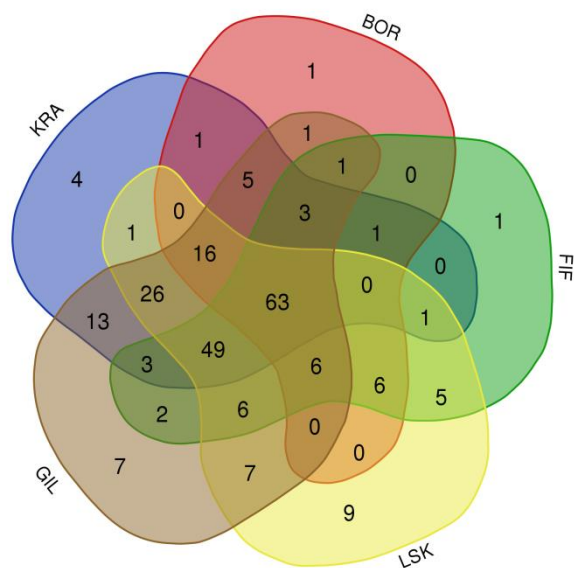

c.

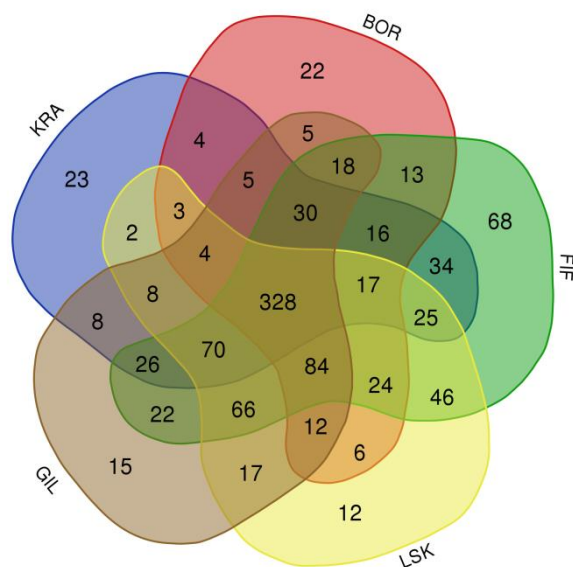

d.

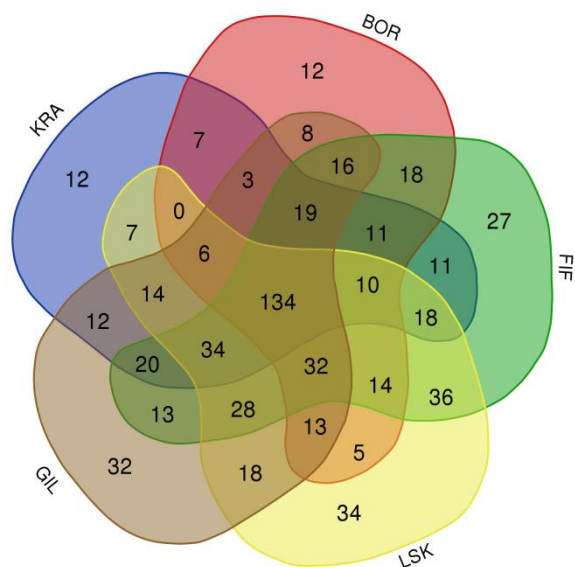

**Supplementary Figure S2** – Venn diagram showing the relationships between the studied sites based on shared OTUs of bacteria (a), cyanobacteria (b), fungi (c) and eukaryotes (d).
